# Supplementary material for: Comparative Efficacy and Safety of P2Y12 Inhibitor Monotherapy and Dual Antiplatelet Therapy in Patients with and without Diabetes Mellitus Undergoing Percutaneous Coronary Intervention
Source: MDPI journal article supplement (doi:10.3390/ijms23094549), 2022-04-20
Supplement: s1 [file s1]

**Table S1.** EMBASE search strategy.

- The Embase database: Contains biomedical literature from 1974 to present.
- The MEDLINE & PubMed database: Covers journals from 1966 to present.
- Embase Classic: The Embase back file covering almost 2 million biomedical and pharmacological citations drawn from over 3,000 international titles from between 1947 and 1973

**Table S2.** PubMed search strategy.

| Search | Query                                                                                                                                                                                                                                                                                                                                                                                                                  | Results   |
|--------|------------------------------------------------------------------------------------------------------------------------------------------------------------------------------------------------------------------------------------------------------------------------------------------------------------------------------------------------------------------------------------------------------------------------|-----------|
| #1     | 'percutaneous coronary intervention':ab,ti OR 'percutaneous coronary revascularization':ab,ti OR pci:ab,ti OR (('percutaneous coronary' NEAR/3 intervention):ab,ti) OR (('percutaneous coronary' NEAR/3 revascularization):ab,ti) OR 'drug eluting stents':ab,ti OR 'drug-eluting stents':ab,ti OR des:ab,ti                                                                                                           | 150,565   |
| #2     | 'coronary artery disease':ab,ti OR 'myocardial infarc*':ab,ti OR 'diabetes mellitus':ab,ti OR acs:ab,ti OR cad:ab,ti OR 'cardiovascular event':ab,ti                                                                                                                                                                                                                                                                   | 501,041   |
| #3     | #1 AND #2                                                                                                                                                                                                                                                                                                                                                                                                              | 60,838    |
| #4     | 'dual antiplatelet therapy':ab,ti OR 'dual anti-platelet therapies':ab,ti OR 'dapt'/exp OR dapt                                                                                                                                                                                                                                                                                                                        | 12,686    |
| #5     | 'monotherapy with p2y12 inhibitor':ab,ti OR 'p2y12 inhibitor monotherapy':ab,ti OR 'short term p2y12 inhibitor':ab,ti OR 'short-term p2y12 inhibitor':ab,ti OR clopidogrel:ab,ti OR prasugrel:ab,ti OR ticagrelor:ab,ti OR ticlopidine:ab,ti OR 'clopidogrel monotherapy':ab,ti OR 'ticagrelor monotherapy':ab,ti                                                                                                      | 30,805    |
| #6     | #4 AND #5                                                                                                                                                                                                                                                                                                                                                                                                              | 4,837     |
| #7     | #3 AND #6                                                                                                                                                                                                                                                                                                                                                                                                              | 1,762     |
| #8     | 'clinical trial'/de OR 'randomized controlled trial'/de OR 'randomization'/de OR 'single blind procedure'/de OR 'double blind procedure'/de OR 'crossover procedure'/de OR ('randomized controlled NEXT/1 trial*) OR rct OR 'randomly allocated' OR 'allocated randomly' OR 'random allocation' OR (allocated NEAR/2 random) OR (single NEXT/1 blind*) OR (double NEXT/1 blind*) OR ((treble OR triple) NEAR/1 blind*) | 1,883,445 |
| #9     | 'meta analysis':ab,ti OR 'systematic review':ab,ti OR sr:ab,ti                                                                                                                                                                                                                                                                                                                                                         | 465,107   |
| #10    | 'net work':ab,ti OR network:ab,ti                                                                                                                                                                                                                                                                                                                                                                                      | 548,040   |
| #11    | #9 OR #10                                                                                                                                                                                                                                                                                                                                                                                                              | 997,217   |
| #12    | #7 AND #8 NOT #11                                                                                                                                                                                                                                                                                                                                                                                                      | 447       |

---

# Searches

---

Results

|           |                                                                                                                                                                                                                                                                                                                                                                                                                                   |                |
|-----------|-----------------------------------------------------------------------------------------------------------------------------------------------------------------------------------------------------------------------------------------------------------------------------------------------------------------------------------------------------------------------------------------------------------------------------------|----------------|
| <b>#1</b> | "percutaneous coronary intervention"[Mesh] OR "coronary intervention*, percutaneous":[tiab] OR "intervention*, percutaneous coronary":[tiab] OR "pci":[tiab] OR "percutaneous coronary revascularization":[tiab] OR "coronary revascularization*, percutaneous":[tiab] OR "percutaneous coronary revascularizations":[tiab] OR "revascularization*, percutaneous coronary":[tiab] OR "drug eluting stent*":[tiab] OR "des":[tiab] | <b>98640</b>   |
| <b>#2</b> | "Dual Anti-Platelet Therapy"[Mesh] OR "dual antiplatelet therapy":[tiab] OR "dapt":[tiab] OR "aspirin":[tiab] OR "clopidogrel":[tiab] OR "prasugrel":[tiab] OR "ticagrelor":[tiab] OR "p2y12 inhibitor":[tiab] OR "anti-platelet therapies, dual":[tiab] OR "antiplatelet therapy, dual":[tiab] OR "dual anti-platelet therapy":[tiab] OR "dual anti-platelet therapies":[tiab]                                                   | <b>63387</b>   |
| <b>#3</b> | "Randomized Controlled Trial"[Publication Type] OR "controlled clinical trial":[tiab] OR "clinical trials, randomized":[tiab] OR "trials, randomized clinical":[tiab] OR "randomized clinical studies":[tiab]                                                                                                                                                                                                                     | <b>564928</b>  |
| <b>#4</b> | "Systematic Review"[Publication Type] OR "Meta-Analysis"[Publication Type] OR "Review"[Publication Type] OR "meta-analysis":[ti] OR "systematic review":[ti] OR "literature review":[ti] OR "expert consensus":[ti] OR "case report":[ti]                                                                                                                                                                                         | <b>3375129</b> |
| <b>#5</b> | <b>#1 AND #2 AND #3 NOT #4</b>                                                                                                                                                                                                                                                                                                                                                                                                    | <b>1054</b>    |

**Table S3.** Cochrane Library search strategy.

| <b>#</b>  | <b>Searches</b>                                                                                                                                                                                                                                                                                                                                                                                                                                          | <b>Results</b> |
|-----------|----------------------------------------------------------------------------------------------------------------------------------------------------------------------------------------------------------------------------------------------------------------------------------------------------------------------------------------------------------------------------------------------------------------------------------------------------------|----------------|
| <b>#1</b> | MeSH descriptor percutaneous coronary intervention explode all trees OR (coronary intervention*, percutaneous):ti,ab,kw OR (intervention*, percutaneous coronary):ti,ab,kw OR (pci):ti,ab,kw OR (percutaneous coronary revascularization*):ti,ab,kw OR (coronary revascularization*, percutaneous):ti,ab,kw OR (revascularization*, percutaneous coronary):ti,ab,kw OR (drug eluting stent*):ti,ab,kw OR (drug-eluting stent):ti,ab,kw OR (des):ti,ab,kw | <b>16744</b>   |
| <b>#2</b> | (dual antiplatelet therapy):ti,ab,kw OR (dapt):ti,ab,kw OR (aspirin):ti,ab,kw OR (clopidogrel):ti,ab,kw OR (prasugrel):ti,ab,kw OR (ticagrelor):ti,ab,kw OR (p2y12 inhibitor):ti,ab,kw OR (anti-platelet therapies, dual):ti,ab,kw OR (antiplatelet therapy, dual):ti,ab,kw OR (dual anti-platelet therapy):ti,ab,kw OR (dual anti-platelet therapies):ti,ab,kw                                                                                          | <b>19073</b>   |

|    |                                                                                                                                                                                                                          |        |
|----|--------------------------------------------------------------------------------------------------------------------------------------------------------------------------------------------------------------------------|--------|
| #3 | 'MeSH descriptor randomized controlled trial explode all trees OR (controlled clinical trial):ti,ab OR (clinical trials, randomized):ti,ab OR (trials, randomized clinical):ti,ab OR (randomized clinical studies):ti,ab | 220299 |
| #4 | #1 AND #2 AND #3                                                                                                                                                                                                         | 678    |

**Table S4.** Bias risk assessment of the studies.

|               | Random sequence generation (selection bias) | Allocation concealment (selection bias) | Blinding of participants and personnel (performance bias) | Blinding of outcome assessment (detection bias) | Incomplete outcome data (attrition bias) | Selective reporting (reporting bias) | Other bias |
|---------------|---------------------------------------------|-----------------------------------------|-----------------------------------------------------------|-------------------------------------------------|------------------------------------------|--------------------------------------|------------|
| GLOBAL LEADER | +                                           | +                                       | -                                                         | +                                               | +                                        | +                                    | ?          |
| SMART CHOICE  | +                                           | +                                       | -                                                         | +                                               | +                                        | +                                    | +          |
| TICO          | +                                           | +                                       | -                                                         | +                                               | +                                        | +                                    | +          |
| TWILIGHT      | +                                           | +                                       | +                                                         | +                                               | +                                        | +                                    | +          |

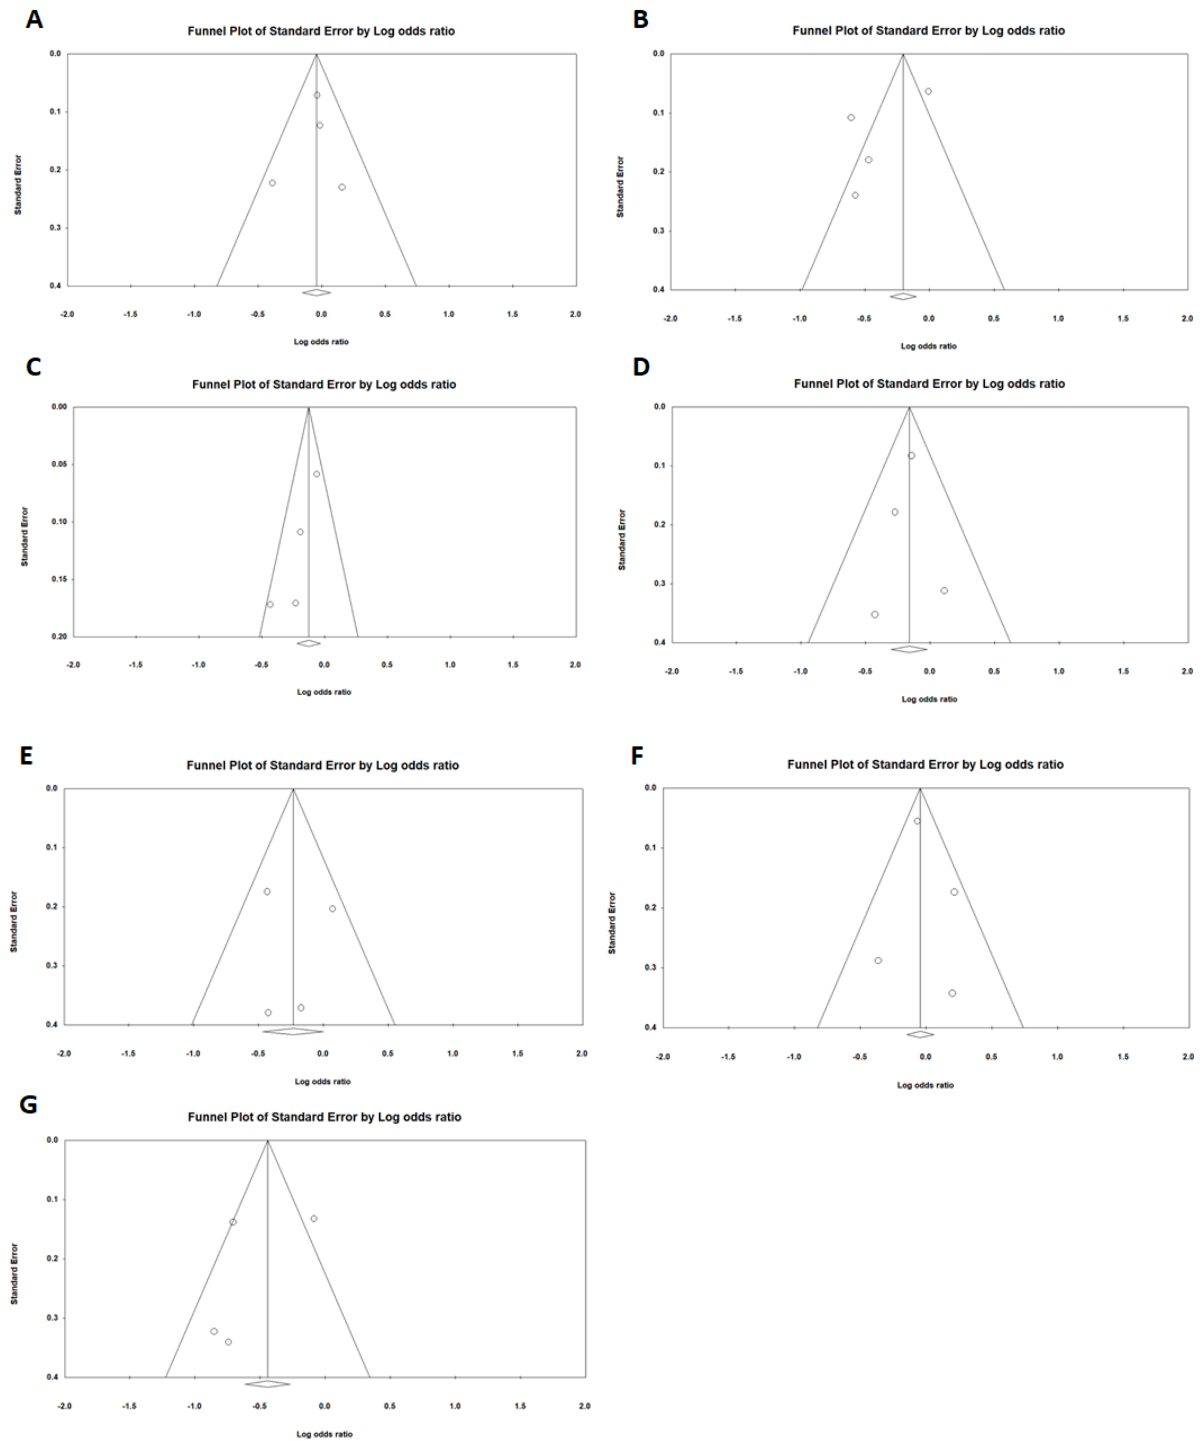

**Figure S1.** The funnel plots of each outcome. **(A)** MACCE, **(B)** major or bleeding, **(C)** NACE, **(D)** MACCE in DM patients, **(E)** major or minor bleeding in DM patients, **(F)** MACCE in non-DM patients, **(G)** major or minor bleeding in non-DM patients.

**Table S5.** The Begg's and Egger's test of each outcome.

| Endpoints | <i>P</i> (Begg's test) | <i>P</i> (Egger's test) |
|-----------|------------------------|-------------------------|
| MACCE     | 0.734                  | 0.784                   |

|                                  |       |       |
|----------------------------------|-------|-------|
| Major or minor bleeding          | 0.734 | 0.253 |
| NACE                             | 0.308 | 0.069 |
| MACCE – DM                       | 0.734 | 0.814 |
| Major or minor bleeding – DM     | 1.000 | 0.973 |
| MACCE – non-DM                   | 1.000 | 0.719 |
| Major or minor bleeding – non-DM | 1.000 | 0.518 |

---
